# Supplementary material for: Arming HSV-Based Oncolytic Viruses with the Ability to Redirect the Host’s Innate Antiviral Immunity to Attack Tumor Cells
Source: PubMed Central journal article supplement — Mol Ther Oncolytics. 2020 Sep 6;19:33–46. doi: 10.1016/j.omto.2020.09.002 (PMC7530262; doi:10.1016/j.omto.2020.09.002), 2020-09-06
Supplement: mmc1.pdf [file mmc1.pdf]

OMTO, Volume 19

## **Supplemental Information**

### **Arming HSV-Based Oncolytic Viruses with the Ability to Redirect the Host's Innate Antiviral Immunity to Attack Tumor Cells**

**Xinping Fu, Lihua Tao, Wanfu Wu, and Xiaoliu Zhang**

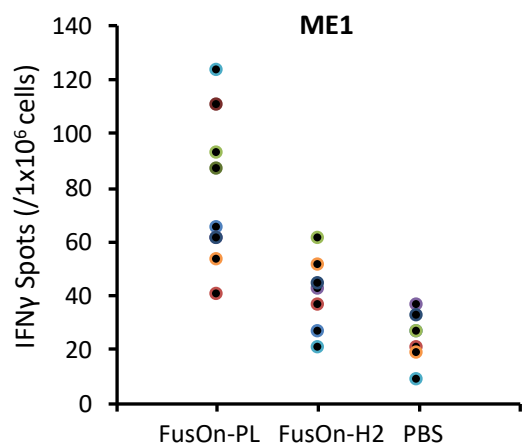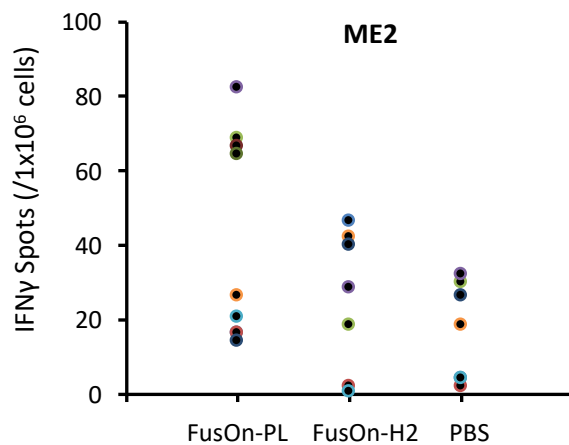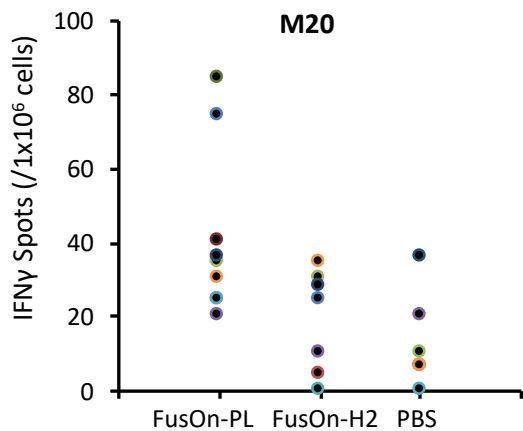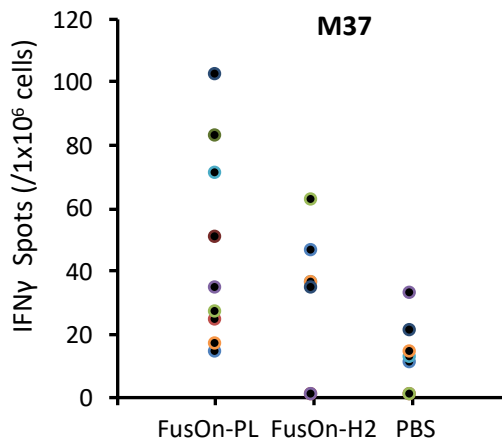

Figure S1. The actual IFN $\gamma$  spot number in individual mouse for the data presented in Fig. 6E
